# Supplementary material for: Ophelimus bipolaris sp. n. (Hymenoptera, Eulophidae), a New Invasive Eucalyptus Pest and Its Host Plants in China
Source: MDPI journal article supplement (doi:10.3390/insects12090778), 2021-08-30
Supplement: s1 [file s1]

## Supplementary Material:

**Table S1.** Details of the sampling, host plant and number of wasps collected.

| Locality                                     | Coordinates               | Host plant                              | Collecting method | No. of wasps |      |
|----------------------------------------------|---------------------------|-----------------------------------------|-------------------|--------------|------|
|                                              |                           |                                         |                   | Fem ale      | Male |
| Guangdong Eco-Engineering Polytechnic (GEEP) | 23°11'58" N               | <i>E. urophylla</i>                     | reared from galls | 1014         | 33   |
|                                              | 113°22'35" E              | <i>E. urophylla</i>                     | direct catch      | 15           | 0    |
| Xiaoguwei Island (XI)                        | 23°4'0" N<br>113°22'41" E | <i>E. urophylla</i>                     | reared from galls | 107          | 2    |
|                                              |                           | <i>E. grandis</i> × <i>E. urophylla</i> | reared from galls | 47           | 0    |
|                                              |                           | <i>E. urophylla</i>                     | reared from galls | 4            | 0    |
| South China Botanical Garden (SCBG)          | 23°10'52" N               | <i>E. tereticornis</i>                  | reared from galls | 4            | 0    |
|                                              | 113°21'28" E              |                                         | reared from galls | 15           | 0    |
| Huolushan Forest Park (HFP)                  | 23°10'39" N               | <i>E. grandis</i>                       | reared from galls | 15           | 0    |
|                                              | 113°22'56" E              | <i>E. urophylla</i>                     | reared from galls | 7            | 0    |

**Table S2.** Interspecific pairwise distance of *Ophelimus* species based on 28S sequences (%).

| Species                       | 1 | 2   | 3       | 4     | 5       |
|-------------------------------|---|-----|---------|-------|---------|
| 1 <i>O. bipolaris</i>         |   | 1.9 | 0.5–0.7 | 2.5   | 2.5     |
| 2 <i>O. eucalypti</i> "Maid"  |   |     | 1.3–1.5 | 1     | 1       |
| 3 <i>O. eucalypti</i> "Trans" |   |     |         | 2–2.2 | 2–2.2   |
| 4 <i>O. maskelli</i>          |   |     |         |       | 0.3–1.7 |
| 5 <i>O. mediterraneus</i>     |   |     |         |       |         |

**Table S3.** Interspecific pairwise distance of *Ophelimus* species based on COI sequences (%).

| Species                   | 1 | 2         | 3        | 4        |
|---------------------------|---|-----------|----------|----------|
| 1 <i>O. bipolaris</i>     |   | 16.1–18.4 | 9.3–18.1 | 7.7      |
| 2 <i>O. maskelli</i>      |   |           | 7.5–28.6 | 9.7–26.9 |
| 3 <i>O. mediterraneus</i> |   |           |          | 8.4–8.9  |
| 4 <i>O. migdanorum</i>    |   |           |          |          |

**Table S4.** Summarized data of body measurements (in mm) and best ratios of *O. bipolaris*.

| Character   | female        |       |       |       |                |       |       |       |               |       |       |       | male           |       |       |       |                |       |       |       |
|-------------|---------------|-------|-------|-------|----------------|-------|-------|-------|---------------|-------|-------|-------|----------------|-------|-------|-------|----------------|-------|-------|-------|
|             | 3 setae (n=8) |       |       |       | 4 setae (n=24) |       |       |       | 5 setae (n=9) |       |       |       | 3 setae (n=14) |       |       |       | 4 setae (n=13) |       |       |       |
|             | min           | max   | mean  | SD    | min            | max   | mean  | SD    | min           | max   | mean  | SD    | min            | max   | mean  | SD    | min            | max   | mean  | SD    |
| BL          | 1.1           | 1.6   | 1.29  | 0.178 | 1.2            | 1.8   | 1.52  | 0.184 | 1.32          | 1     | 1.58  | 0.157 | 1              | 1.2   | 1.1   | 0.06  | 1.01           | 1.2   | 1.11  | 0.07  |
| MvL         | 0.194         | 0.214 | 0.206 | 0.008 | 0.198          | 0.22  | 0.212 | 0.005 | 0.212         | 0.219 | 0.214 | 0.002 | 0.194          | 0.21  | 0.204 | 0.007 | 0.195          | 0.21  | 0.203 | 0.006 |
| StvL        | 0.11          | 0.12  | 0.113 | 0.003 | 0.101          | 0.128 | 0.116 | 0.007 | 0.113         | 0.124 | 0.119 | 0.003 | 0.11           | 0.115 | 0.112 | 0.002 | 0.11           | 0.115 | 0.112 | 0.002 |
| PmvL        | 0.037         | 0.049 | 0.041 | 0.004 | 0.04           | 0.051 | 0.046 | 0.003 | 0.042         | 0.051 | 0.048 | 0.003 | 0.036          | 0.042 | 0.039 | 0.002 | 0.036          | 0.042 | 0.039 | 0.002 |
| MetL        | 0.022         | 0.027 | 0.024 | 0.002 | 0.023          | 0.029 | 0.026 | 0.002 | 0.022         | 0.029 | 0.026 | 0.002 | 0.023          | 0.026 | 0.024 | 0.001 | 0.023          | 0.027 | 0.024 | 0.001 |
| PpL         | 0.046         | 0.052 | 0.05  | 0.002 | 0.049          | 0.058 | 0.052 | 0.003 | 0.049         | 0.057 | 0.052 | 0.003 | 0.048          | 0.052 | 0.05  | 0.001 | 0.047          | 0.052 | 0.05  | 0.001 |
| Best Ratios |               |       |       |       |                |       |       |       |               |       |       |       |                |       |       |       |                |       |       |       |
| MvL/StvL    | 1.764         | 1.875 | 1.82  | 0.046 | 1.719          | 1.96  | 1.828 | 0.071 | 1.766         | 1.876 | 1.8   | 0.033 | 1.764          | 1.875 | 1.816 | 0.037 | 1.772          | 1.842 | 1.814 | 0.024 |
| PmvL/StvL   | 0.336         | 0.408 | 0.36  | 0.022 | 0.368          | 0.413 | 0.395 | 0.012 | 0.372         | 0.413 | 0.4   | 0.016 | 0.327          | 0.368 | 0.35  | 0.014 | 0.327          | 0.368 | 0.346 | 0.013 |
| PpL/MetL    | 1.96          | 2.174 | 2.091 | 0.074 | 1.857          | 2.167 | 2.026 | 0.104 | 1.857         | 2.227 | 2.022 | 0.112 | 1.962          | 2.174 | 2.088 | 0.064 | 1.926          | 2.217 | 2.056 | 0.084 |

Note: BL=body length; MvL=marginal vein length; StvL=stigmatal vein length; PmvL=postmarginal vein length; MetL=metascutellum length; PpL=propodeum length.

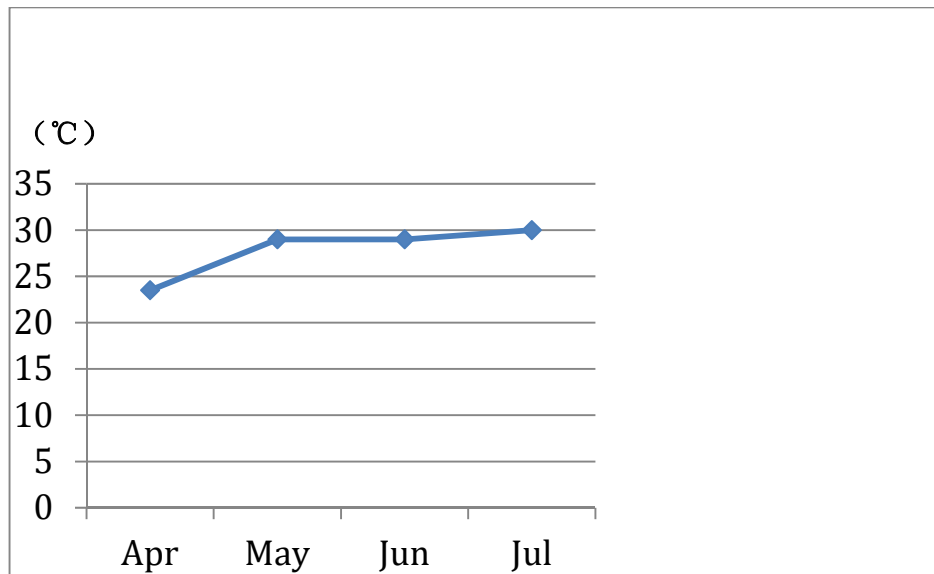

**Figure S1.** Average temperatures of Guangzhou from April to July, 2021.  
(Data from China Meteorological Data Service Center.)

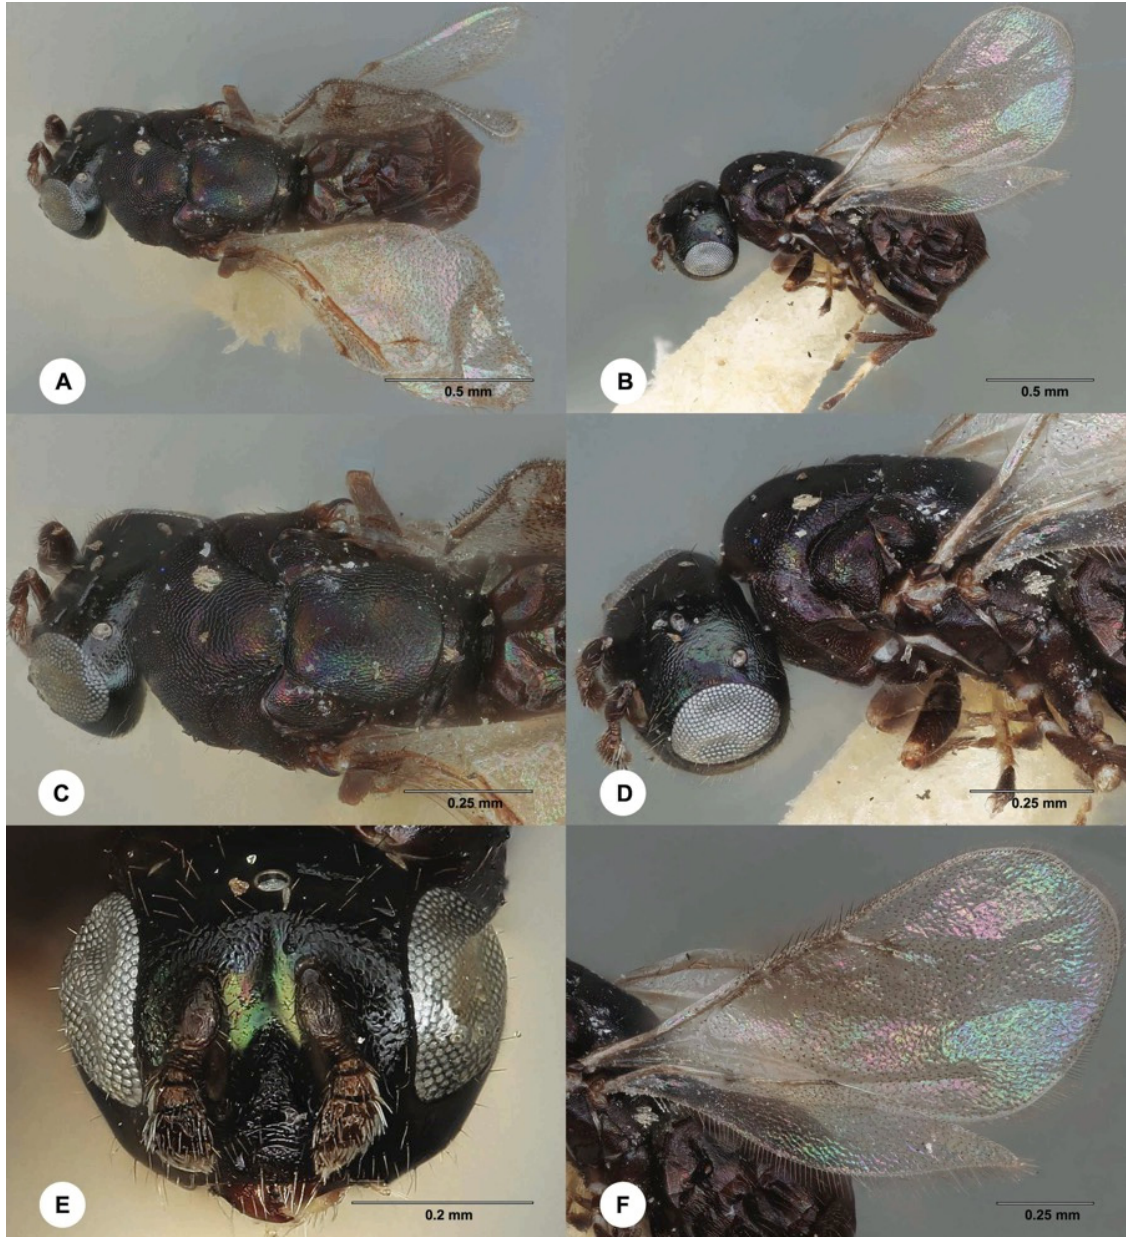

**Figure S2.** *Rhicnopeltella eucalyptis* Gahan, holotype, female **A** Habitus, dorsal view **B** Habitus, lateral view **C** Head and mesosoma, dorsal view **D** Head and mesosoma, lateral view **E** Head, anterior view **F** Wings. (Images are used with permission from NMNH.)
